# Supplementary material for: Injection Site Matters: A Comparative Analysis of Transpulmonary Thermodilution via Simultaneous Femoral and Jugular Indicator Injections under Veno-Venous Extracorporeal Membrane Oxygenation Therapy
Source: MDPI journal article supplement (doi:10.3390/jcm13082334), 2024-04-17
Supplement: s1 [file s1]

| Comparison of TPTD-derived parameters       |                                   |                                   |                    |                    |
|---------------------------------------------|-----------------------------------|-----------------------------------|--------------------|--------------------|
| Parameter                                   | Jugular<br>indicator<br>injection | Femoral<br>indicator<br>injection | Number<br>of pairs | P-value            |
| CO [l/min]                                  | 6.37 ± 2.11                       | 8.31 ± 2.07                       | 23                 | <b>0.0029</b>      |
| CI [l/min/m <sup>2</sup> ]                  | 3.10 ± 1.19                       | 4.19 ± 1.01                       | 23                 | <b>0.001</b>       |
| CFI [1/min]                                 | 2.53 ± 1.06                       | 1.44 ± 0.60                       | 21                 | <b>&lt; 0.0001</b> |
| SVRI [dynSm <sup>2</sup> /cm <sup>5</sup> ] | 1861 ± 771                        | 1303 ± 471                        | 23                 | <b>0.005</b>       |
| EVLW [ml]                                   | 1250 ± 499                        | 1931 ± 635                        | 21                 | <b>0.0002</b>      |
| EVLWI [ml/kg]                               | 18.3 ± 6.71                       | 29.3 ± 10.9                       | 21                 | <b>0.0003</b>      |
| ITBV [ml]                                   | 1587 ± 332                        | 3923 ± 1193                       | 21                 | <b>&lt; 0.0001</b> |
| ITBVI [ml/m <sup>2</sup> ]                  | 806 ± 125                         | 2163 ± 631                        | 21                 | <b>&lt; 0.0001</b> |
| GEDV [ml]                                   | 1260 ± 267                        | 3139 ± 955                        | 21                 | <b>&lt; 0.0001</b> |
| GEDVI [ml/m <sup>2</sup> ]                  | 687 ± 141                         | 1731 ± 505                        | 21                 | <b>&lt; 0.0001</b> |
| PVPI                                        | 3.89 ± 1.47                       | 2.49 ± 1.21                       | 21                 | <b>0.004</b>       |
| SVV [%]                                     | 14.1 ± 5.56                       | 12.7 ± 5.45                       | 22                 | 0.07               |
| ITTV [ml]                                   | 2837 ± 729                        | 5897 ± 1387                       | 20                 | <b>&lt; 0.0001</b> |
| PTV [ml]                                    | 1616 ± 616                        | 2597 ± 883                        | 20                 | <b>0.0002</b>      |
| MTt [s]                                     | 29.50 ± 11.80                     | 45.40 ± 16.60                     | 20                 | <b>&lt; 0.0001</b> |
| DSt [s]                                     | 16.70 ± 8.21                      | 21.0 ± 7.83                       | 20                 | <b>0.0031</b>      |

**Supplementary Table S1:** Comparison of TPTD-derived parameters from jugular and femoral indicator injections

*CI* cardiac index, *CFI* cardiac function index, *CO* cardiac output, *DSt* downslope time, *EVLW* extravascular lung water, *EVLWI* extravascular lung water index, *GEDV* global end-diastolic volume, *GEDVI* global end-diastolic volume index, *ITBV* intrathoracic blood volume, *ITBVI* intrathoracic blood volume index, *ITTV* intrathoracic thermal volume, *MTt* mean transit time, *PTV* pulmonary thermal volume, *PVPI* pulmonary vascular permeability index, *SVRI* systemic vascular resistance index.
